# Supplementary material
Source: publisher site journal article supplement (https://www.dovepress.com/article/603014)

**Supplementary Information [Han et al]**

**Prediction of postoperative pulmonary complications** **in geriatric patients with hip fracture using lung ultrasonography score and diaphragmatic mobility**

Xiaorui Han1, Wen Chi2, Peng Pang3, Xiaobing Liu1, Zhenguo Luo1, Wenbo Cai1, Li Zhang1, Wangyang Li4, Zhirong Wang5, Jianhong Hao1

1Department of Anaesthesiology, HongHui Hospital, Xi'an JiaoTong University, Xi'an, Shaanxi Province, China; 2Department of Operating room, HongHui Hospital, Xi'an JiaoTong University, Xi'an, Shaanxi Province, China; 3Department of Anaesthesiology, Binzhou Medical College Affiliated Hospital, Binzhou, Shandong Province, China; 4Emergency Department, Linfen Hospital Afﬁliated to Shanxi Medical University, Linfen, Shanxi Province, China; 5Department of Diagnostic Ultrasound, Linfen Hospital Afﬁliated to Shanxi Medical University, Linfen, Shanxi Province, China

Correspondence: Jianhong Hao. Department of Anaesthesiology, HongHui Hospital, Xi'an JiaoTong University, Xi'an,710000, Shaanxi Province, China. E-mail: haojianhong@xashhyy9.wecom.work, haojianhong722@163.comORCID ID: https://orcid.org/0000-0001-5753-9910

**Supplementary material**

Thirty-five volunteers were included in the analysis. Bland-Altman plots were used for a priori analysis to evaluate the agreement between measurements performed by the two sonographers. Bland‑Altman analysis showed a bias of 0.05 and limits of agreement of −1.77 to 1.87 for lung ultrasound score (LUS) measurements (Figure A); a bias of 0.01 and limits of agreement of −0.69 to 0.72 for diaphragmatic mobility (DM) measurements (Figure B).


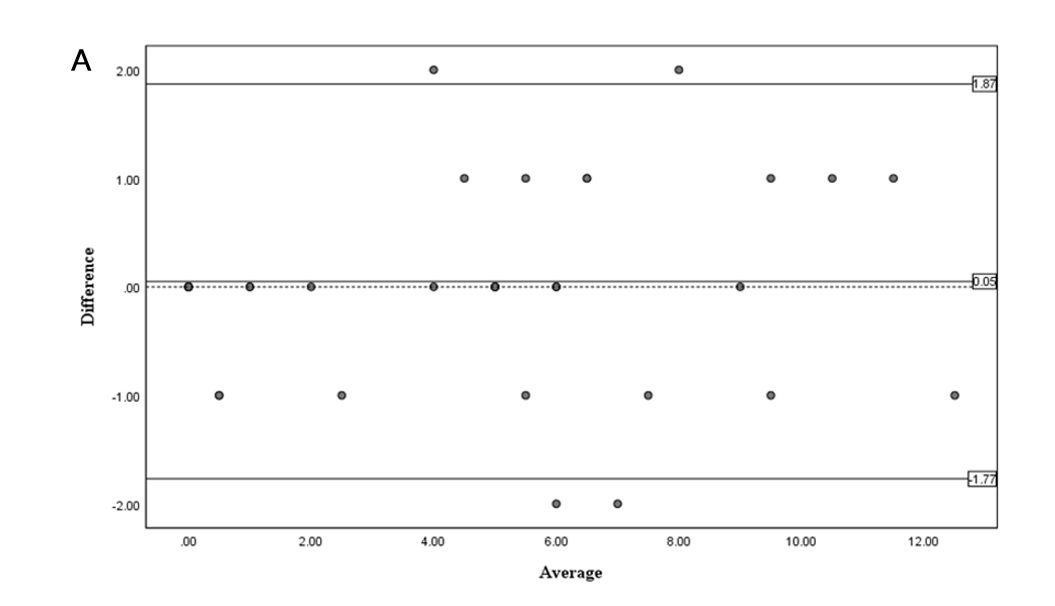

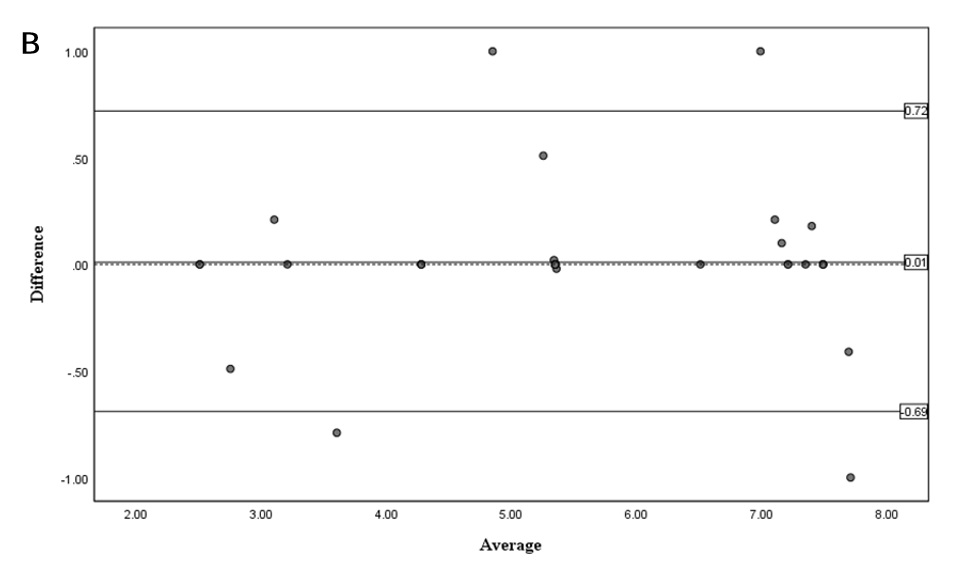

Supplement: Supplementary file 1 [file 603014%20Revised%20Supplementary%20Information.docx]
